# Supplementary material
Source: ML conference proceedings conference paper supplement (https://openreview.net/forum?id=-8sBpe7rDiV)

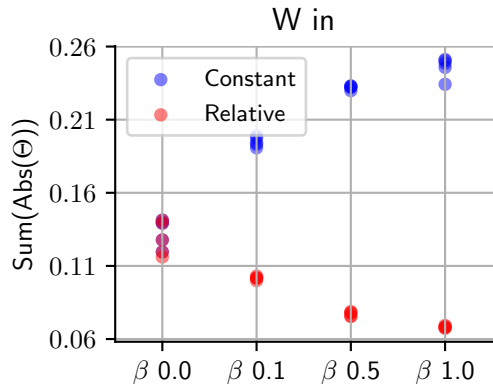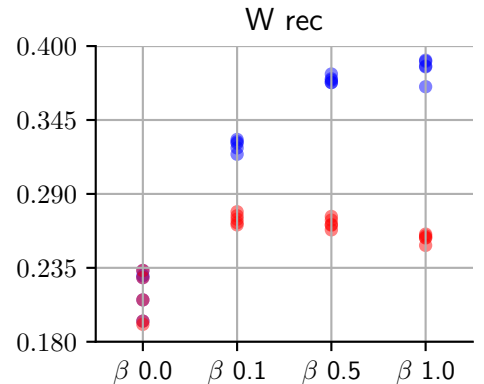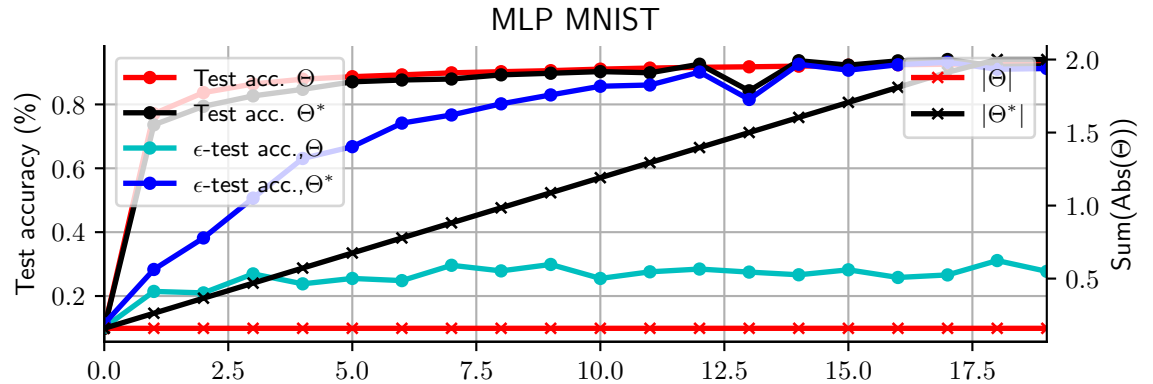

Supplement: supplementary_material [file attachment]

F-MNIST CNN

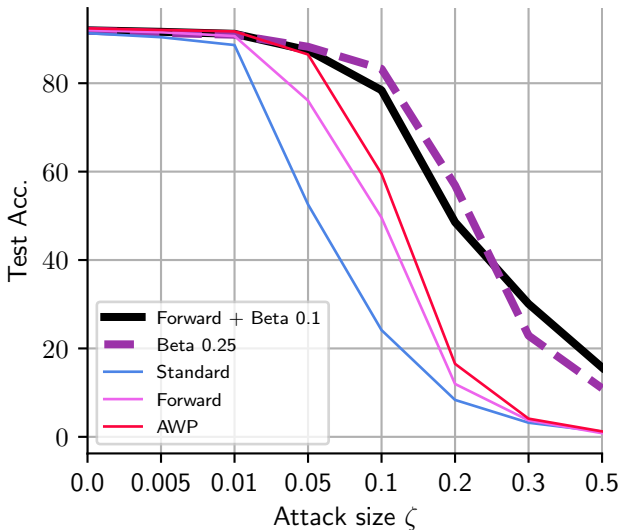

ECG LSNN

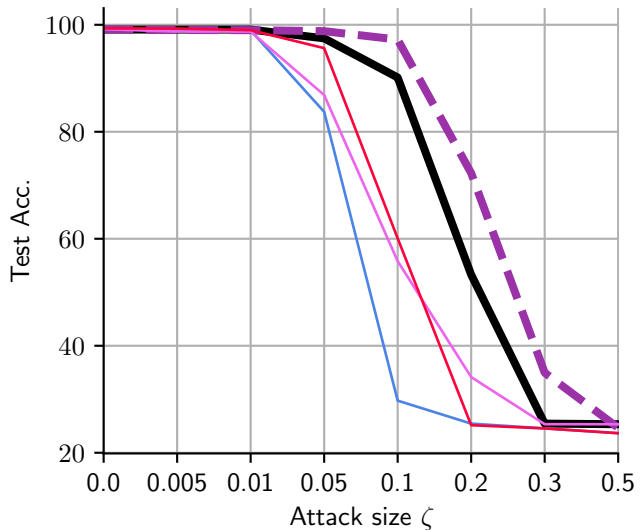

Speech LSNN

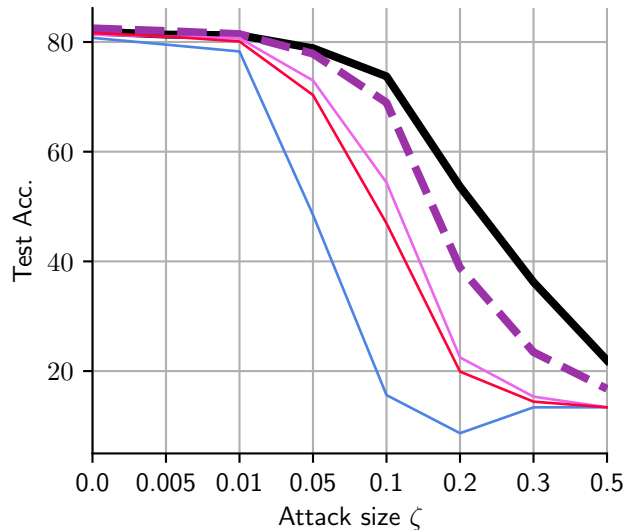

Supplement: supplementary_material [file attachment]

F-MNIST CNN

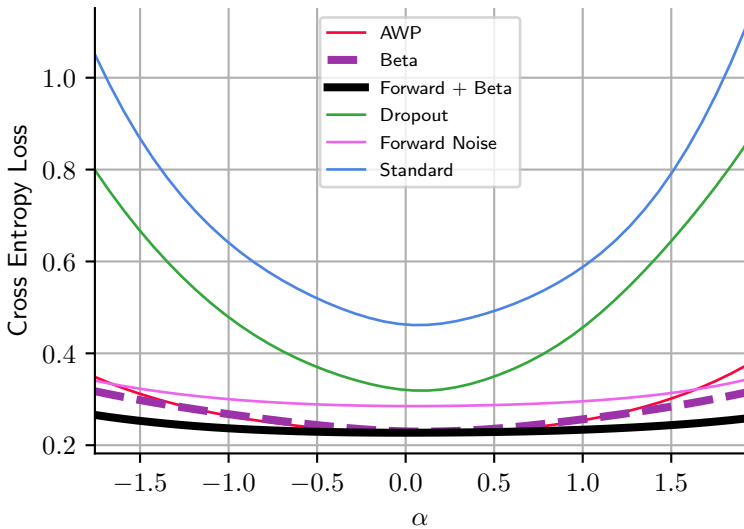

ECG SRNN

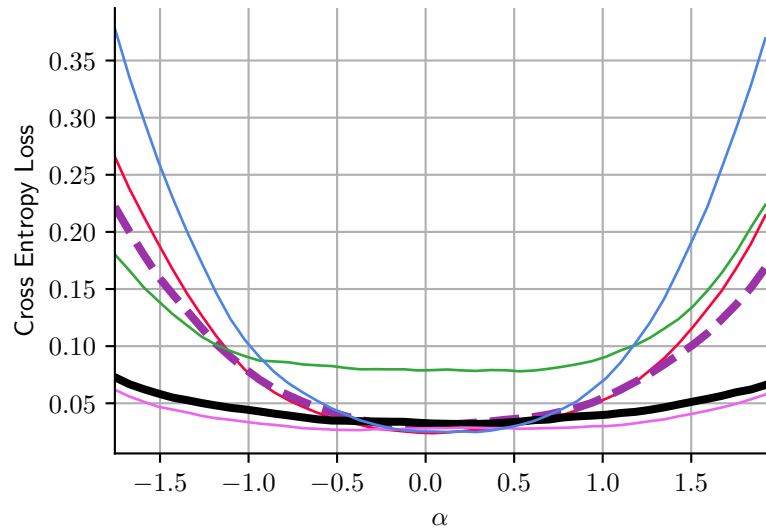

Speech SRNN

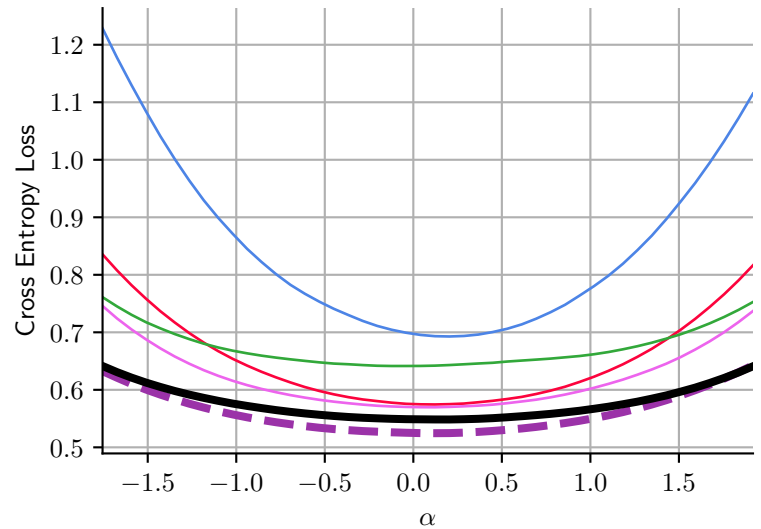

Supplement: supplementary_material [file attachment]

F-MNIST CNN

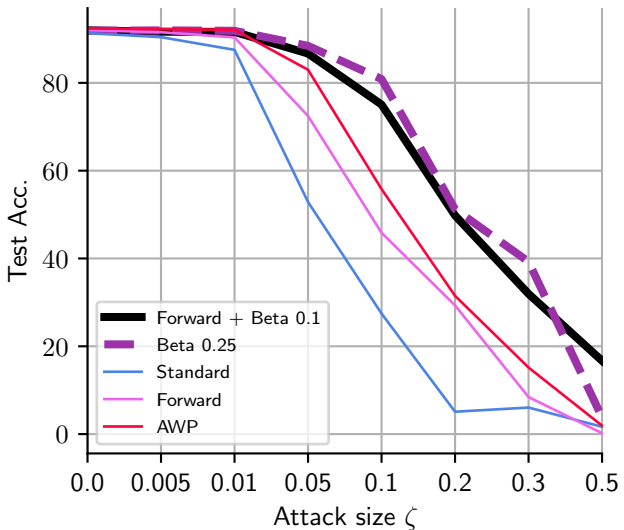

ECG LSNN

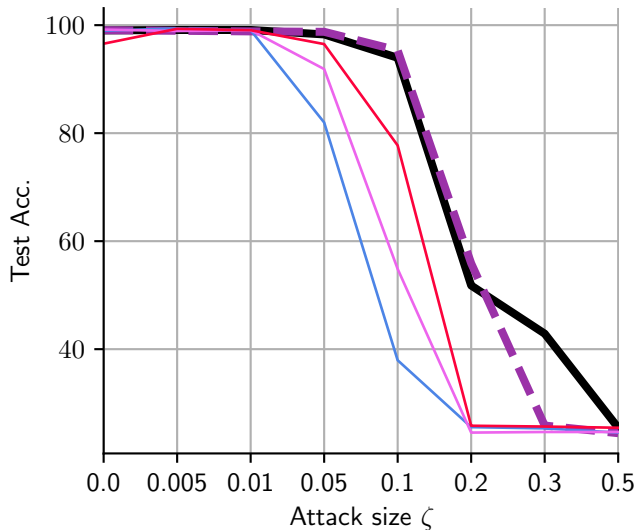

Speech LSNN

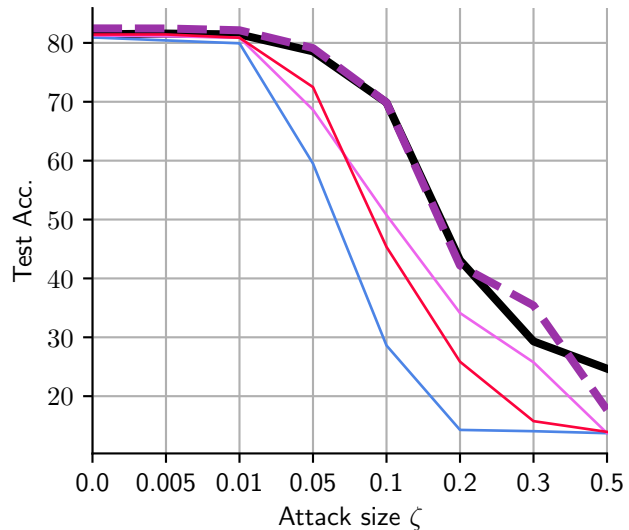

Supplement: supplementary_material [file attachment]

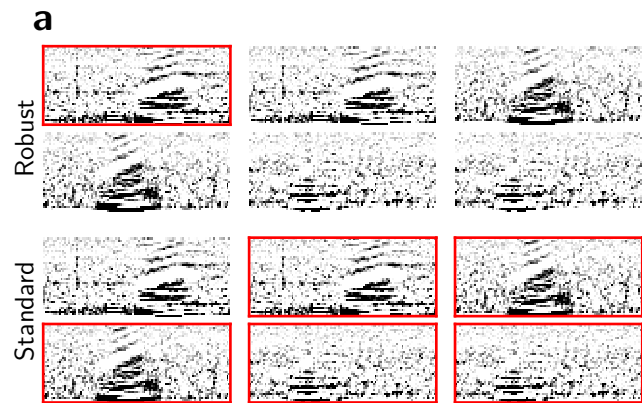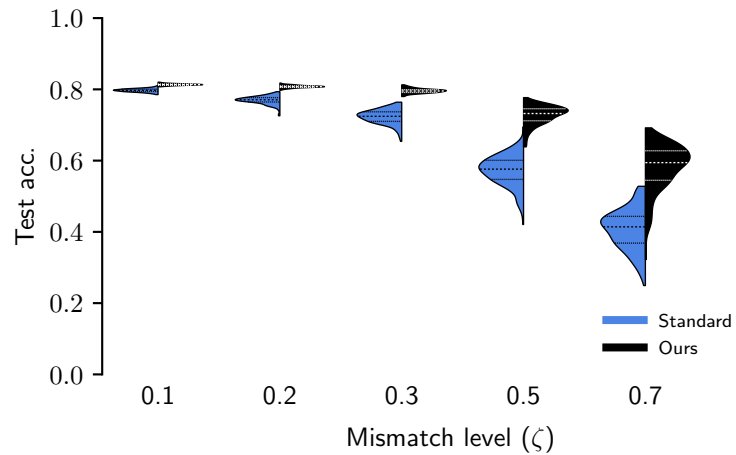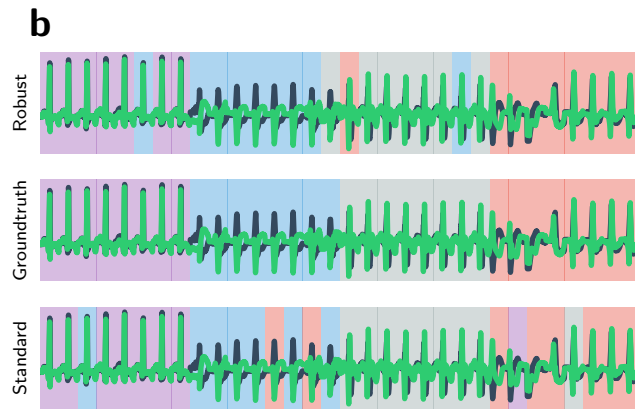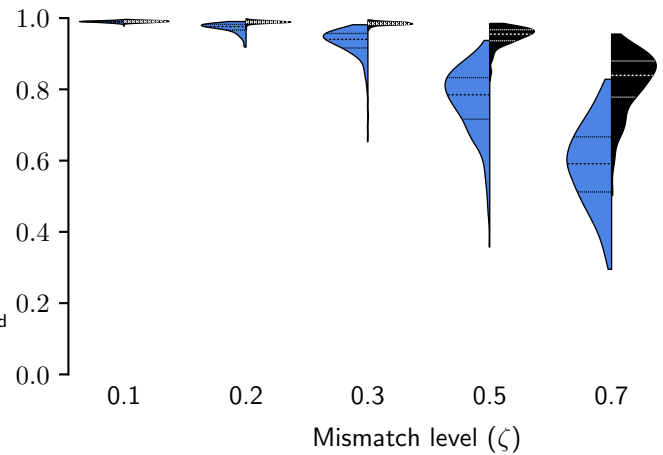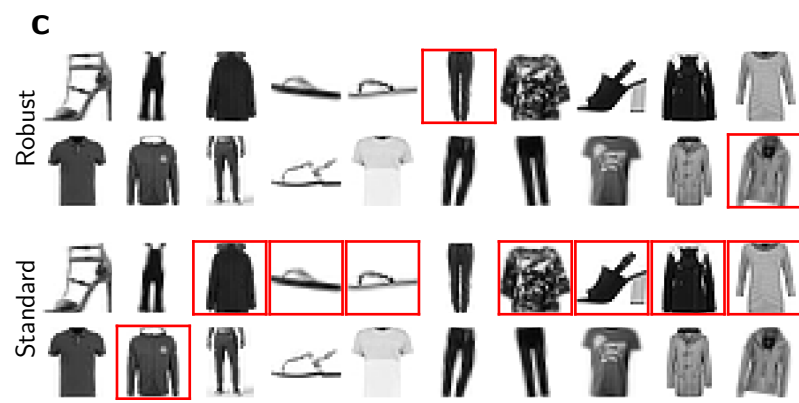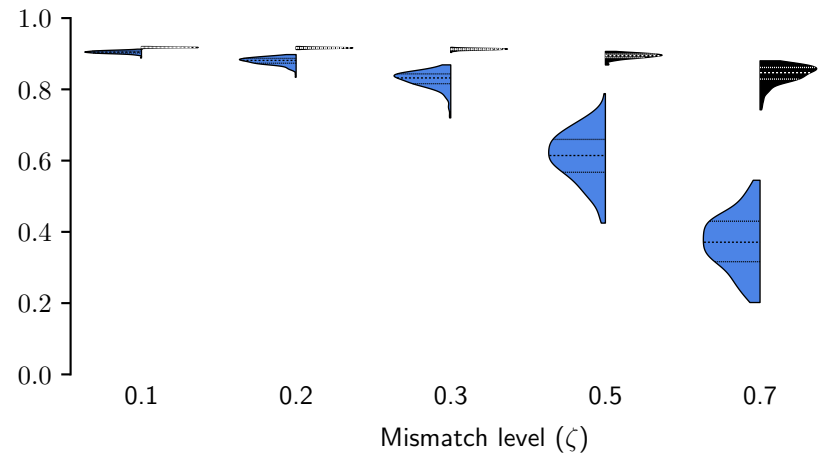

Supplement: supplementary_material [file attachment]

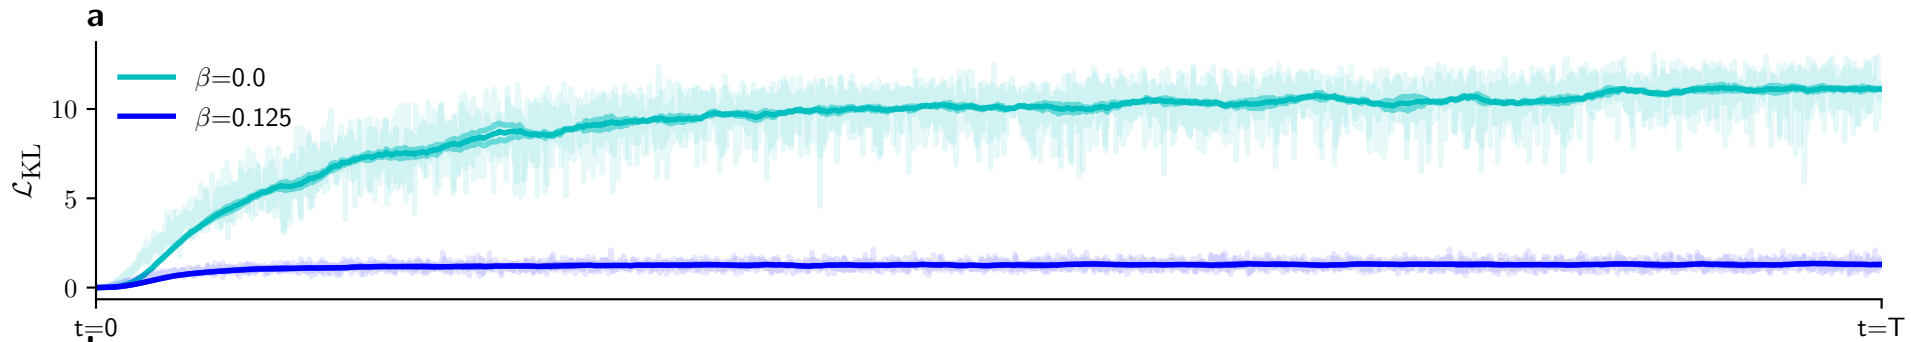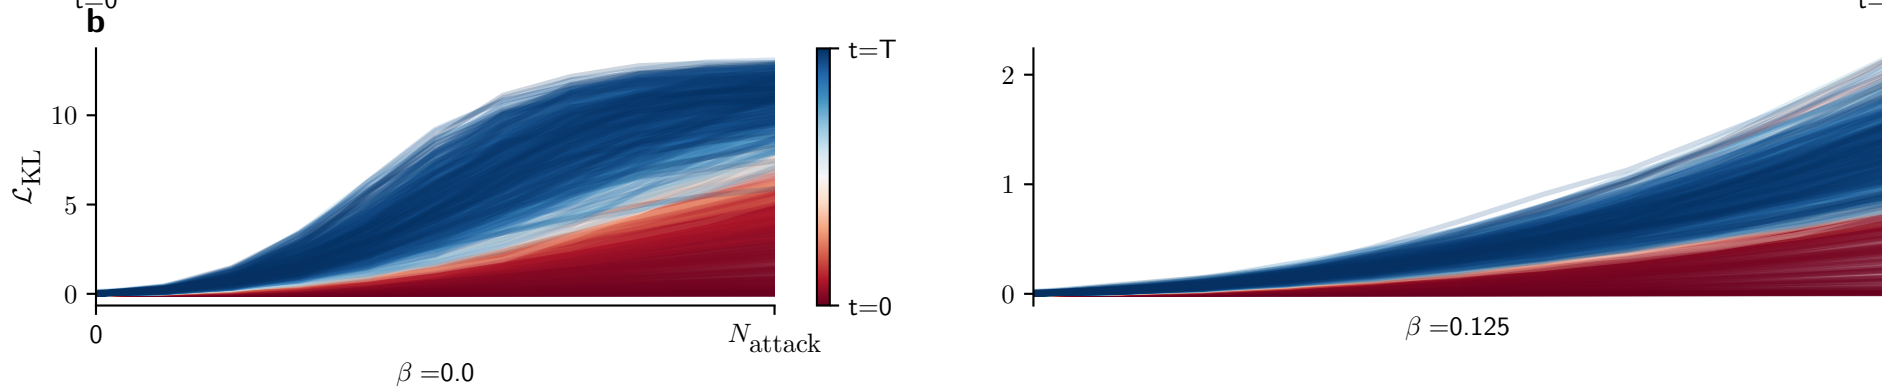

Supplement: supplementary_material [file attachment]

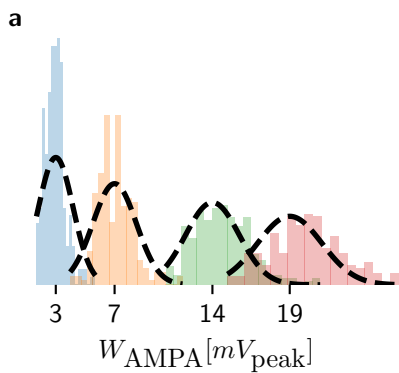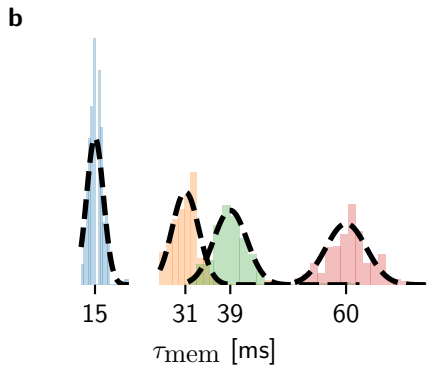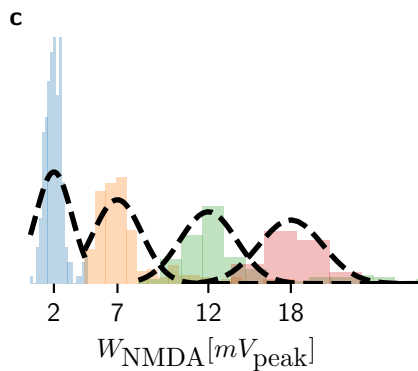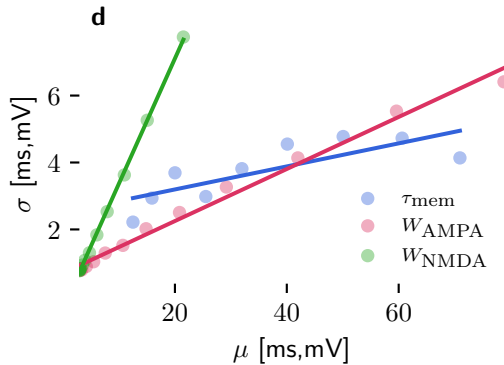

Supplement: supplementary_material [file attachment]

F-MNIST CNN

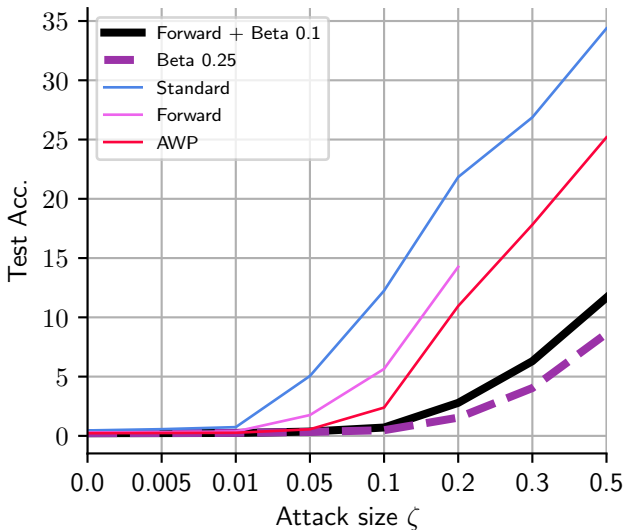

ECG LSNN

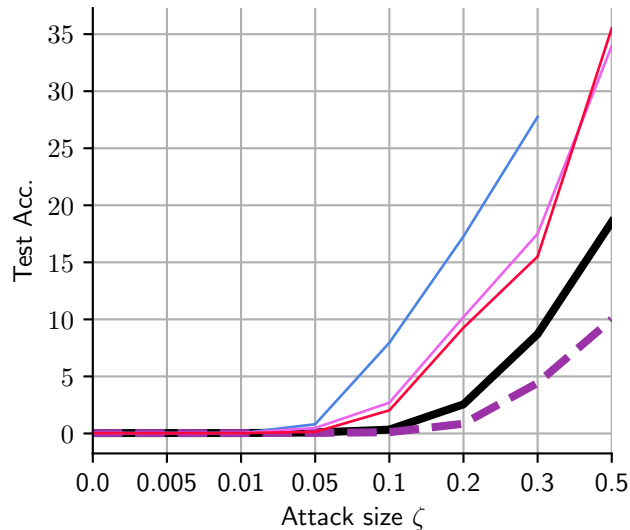

Speech LSNN

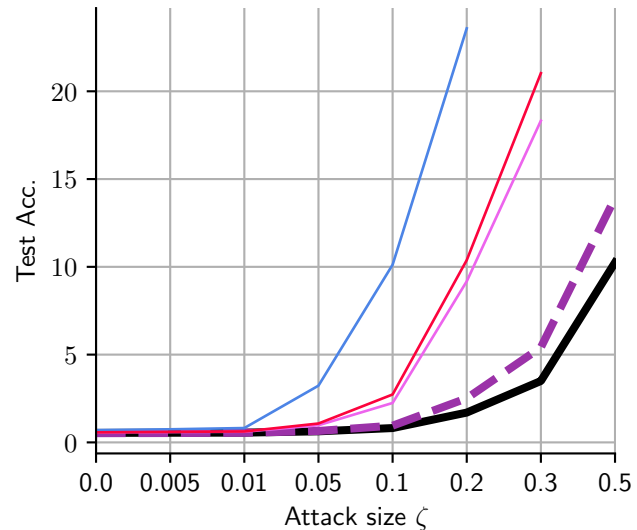

Supplement: supplementary_material [file attachment]

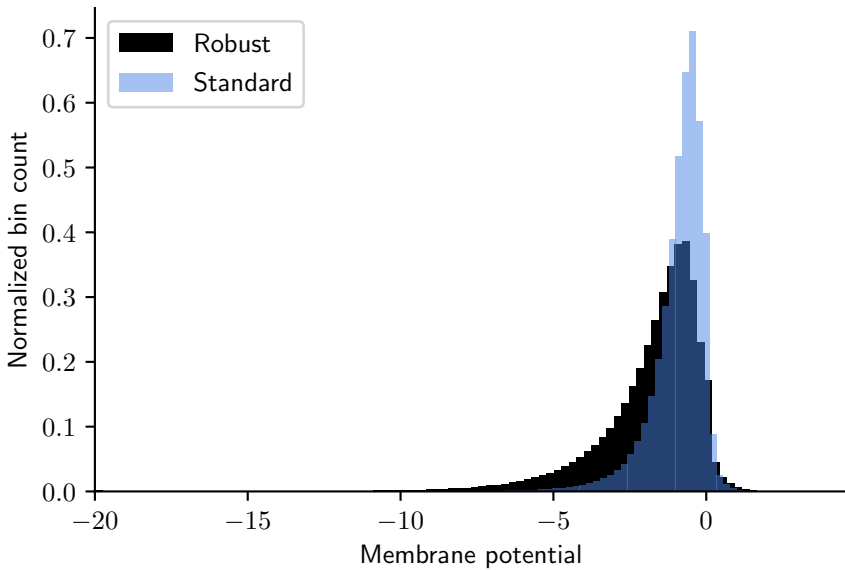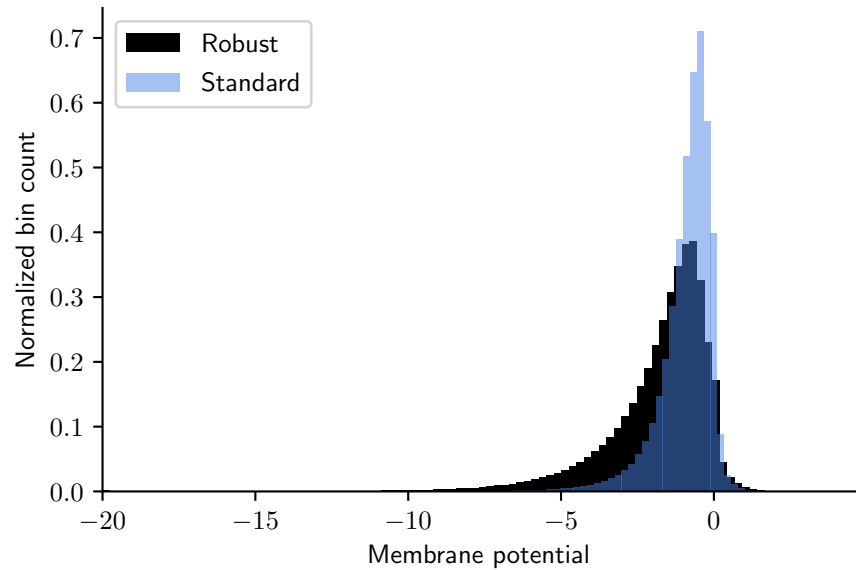

Supplement: supplementary_material [file attachment]

F-MNIST CNN

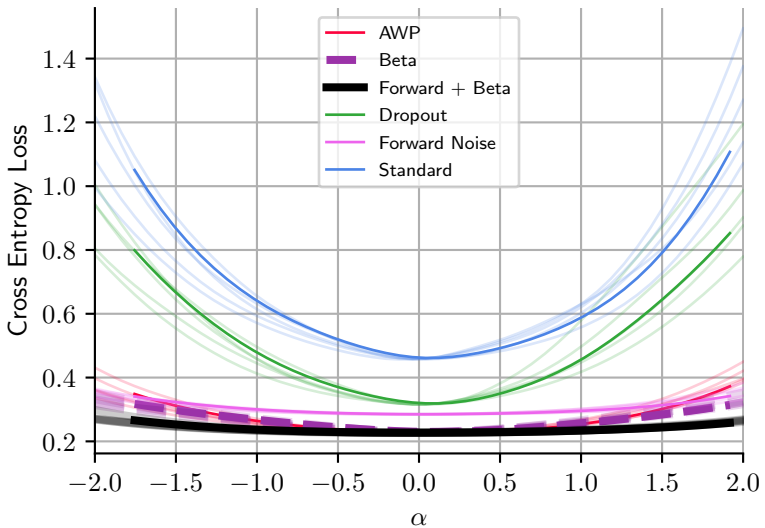

ECG SRNN

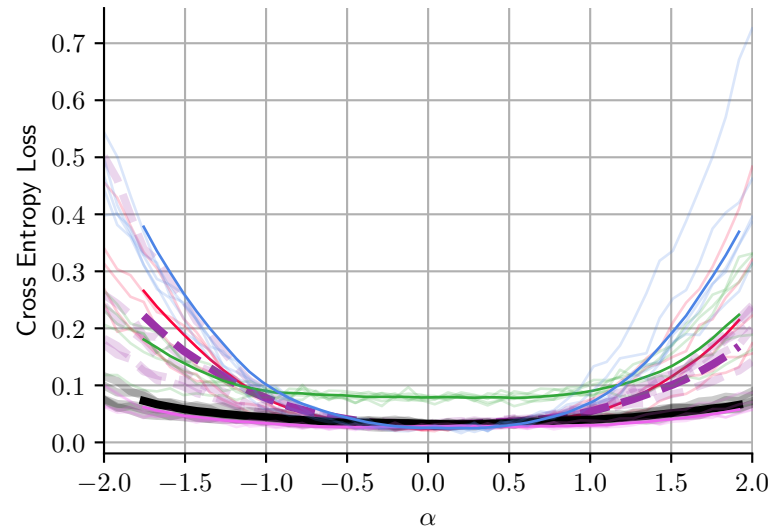

Speech SRNN

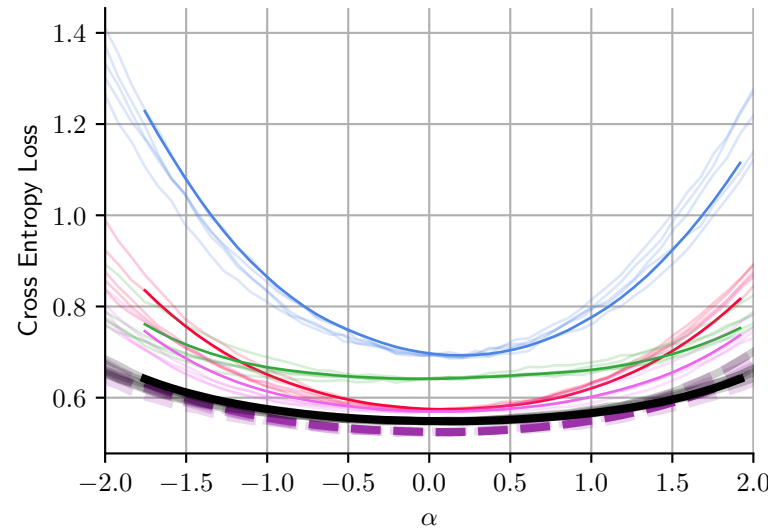

Supplement: supplementary_material [file attachment]

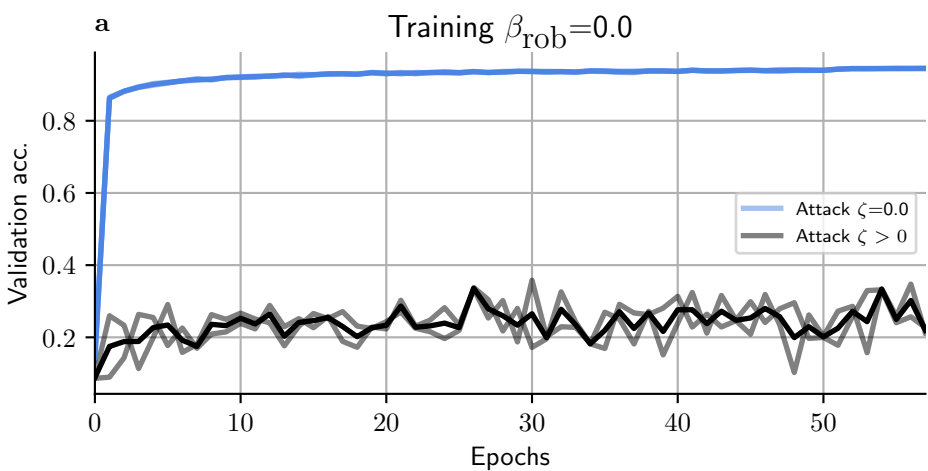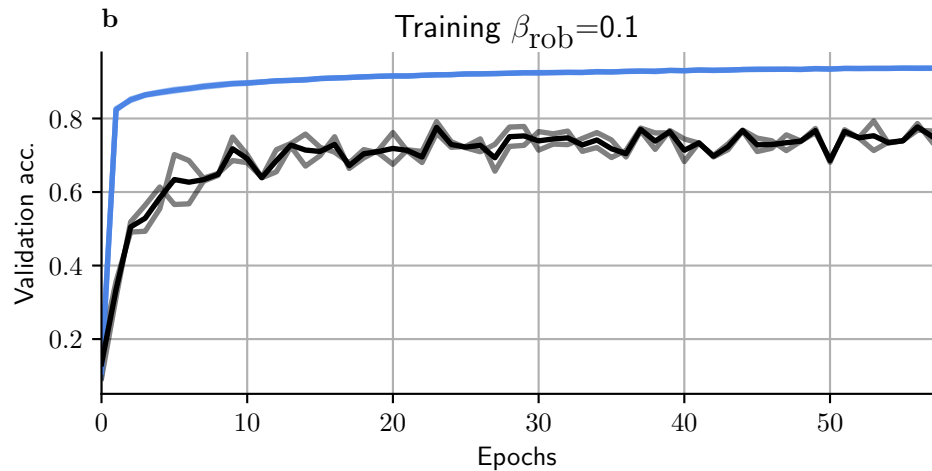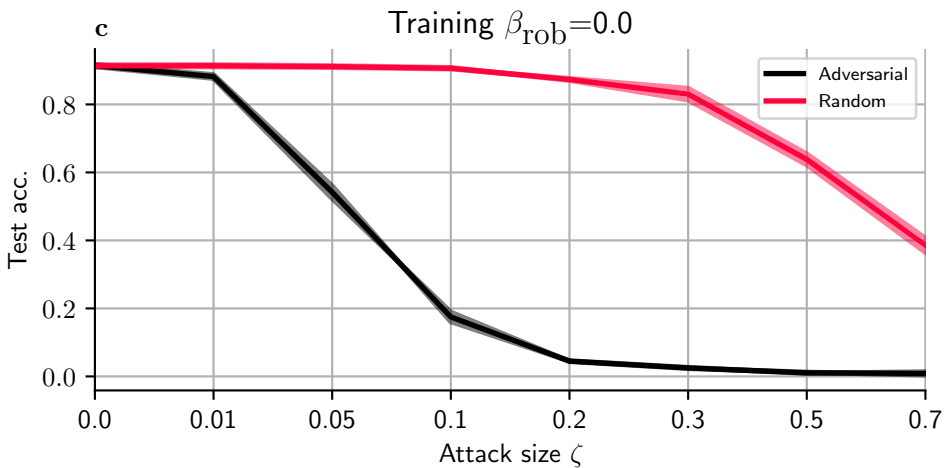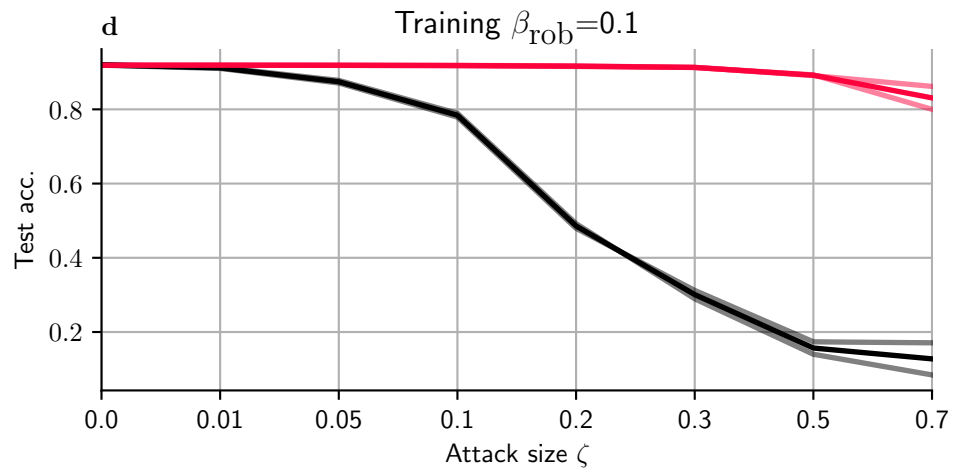

Supplement: supplementary_material [file attachment]

Speech LSNN

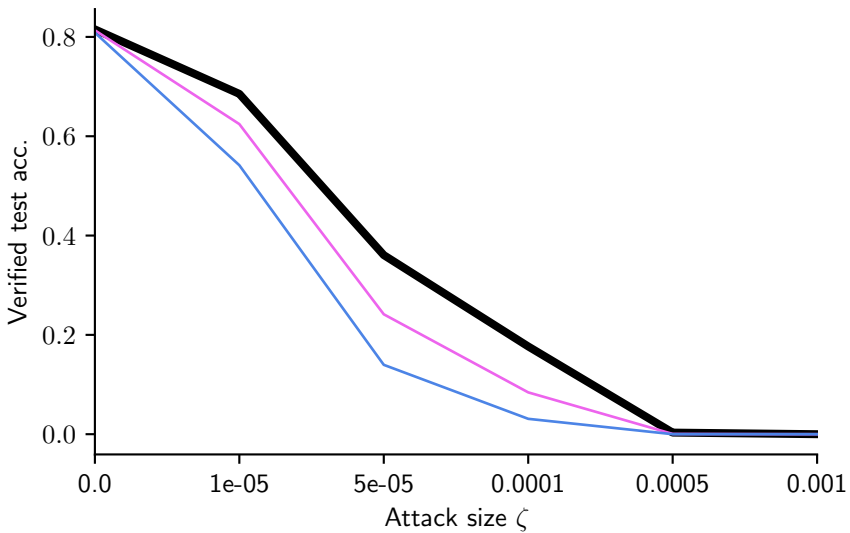

ECG LSNN

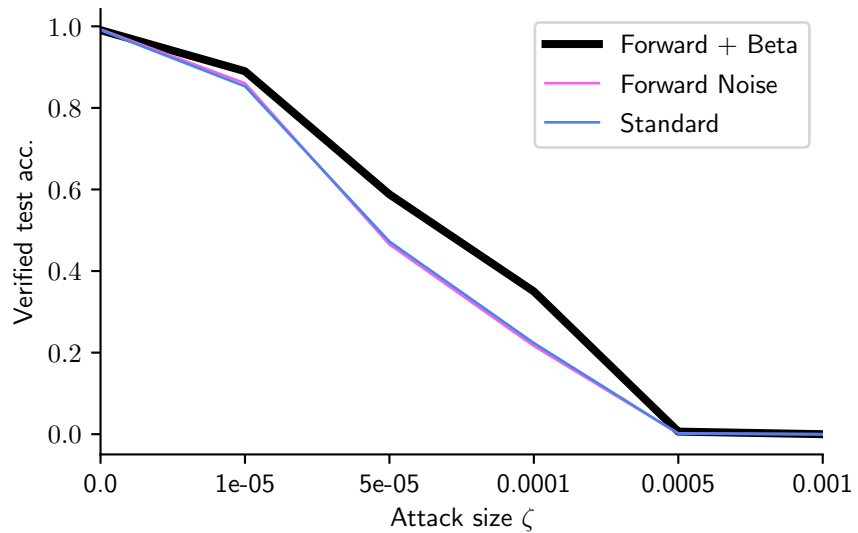

Supplement: supplementary_material [file attachment]

F-MNIST CNN

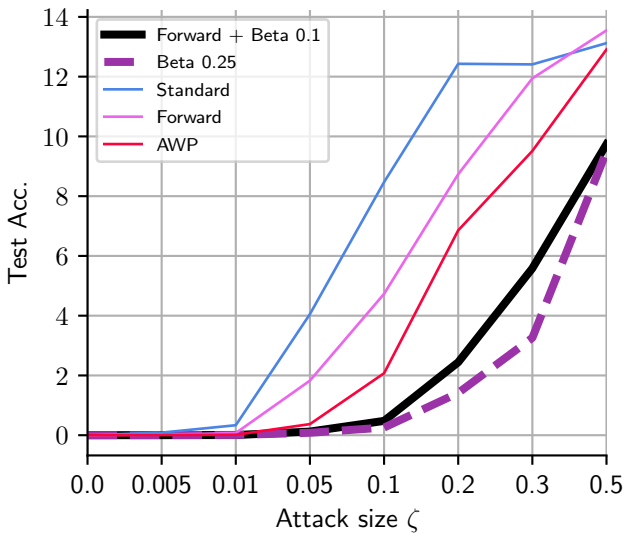

ECG LSNN

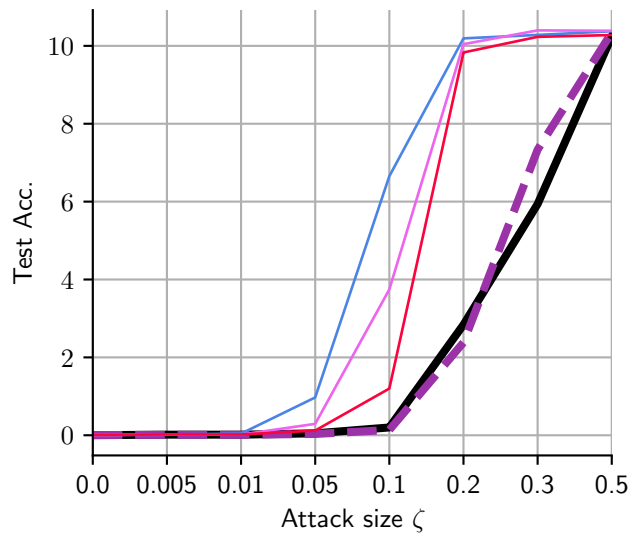

Speech LSNN

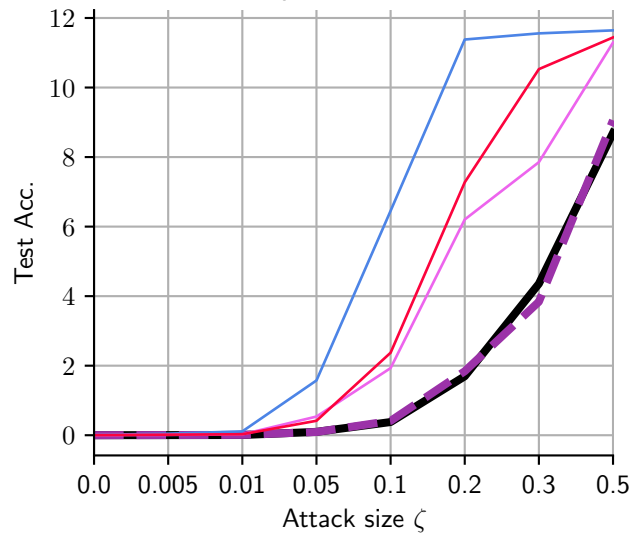

Supplement: supplementary_material [file attachment]
